# Supplementary material for: Antibody-secreting macrophages generated using CpG-free plasmid eliminate tumor cells through antibody-dependent cellular phagocytosis
Source: PubMed Central journal article supplement — BMB Rep. 2020 Aug 31;53(8):442–7. doi: 10.5483/BMBRep.2020.53.8.024 (PMC7473480; doi:10.5483/bmbrep.2020.53.8.024), 2020-08-31
Supplement: BMB-53-442_Supple.pdf [file BMB-53-442_Supple.pdf]

## Supplementary Information

# Antibody-secreting macrophages generated using CpG-free plasmid eliminate tumor cells through antibody-dependent cellular phagocytosis

Eun Bi Cha<sup>1,2</sup>, Keun Koo Shin<sup>1</sup>, Jinho Seo<sup>1,\*</sup>, and Doo-Byoung Oh<sup>1,2,\*</sup>

1 Environmental Disease Research Center, Korea Research Institute of Bioscience and Biotechnology (KRIBB), Daejeon, Korea.

2 Department of Biosystems and Bioengineering, KRIBB School of Biotechnology, University of Science and Technology (UST), Daejeon, Korea.

### Contents

#### Supplementary Materials and Methods

Supplementary Table S1. Primer sequences.

Supplementary Figure S1. Establishment of pcDNA3.1-GFP, pCGf-GFP, and pCGfd-GFP vectors.

Supplementary Figure S2. The vector for secretory expression of anti-EGFR scFv-Fc.

Supplementary Figure S3. The EGFR expression levels of A431, HT-29, and A673 cells.

Supplementary Figure S4. The Establishment of EGFRKO A431 cells.

## Construction of plasmids

The Lucia gene in the pCpGfree-Lucia purchased from InvivoGen (InvivoGen, San Diego, CA, USA) was replaced by the green fluorescent protein (GFP) gene amplified from pCFP4-CXCR4-IRES-EGFP by PCR using the GFP-Fw and GFP-Rv primers (Table S1), which generated pCGf-GFP. For the construction of pCGfd-GFP with the reduced size, the S/MAR and  $\beta$ -globin MAR sequences were removed from pCGf-GFP. Briefly, the sequences necessary for pCGfd-GFP were amplified by the PCR using two pairs of the dMAR-1 and dMAR-2 primers (Table S1). The amplified DNA fragments were joined by using the Gibson assembly method (New England Biolabs, Beverly, MA, USA), which generated pCGfd-GFP. All of the plasmid sequences were confirmed by sequencing (Cosmo Genetech, Seoul, Korea).

For the construction of pCGfd-aEGFR-scFv-Fc plasmid, the sequences coding anti-EGFR scFv (derived from Cetuximab) and human IgG-Fc-C223P were synthesized by Bioneer (Daejeon, Korea). The leader sequence of murine immunoglobulin kappa light chain was created in the front of the sequencing coding anti-EGFR scFv by the successive extension PCR using three forward primers (EGFR-1st-Fw, SP-2nd-Fw, SP-3rd-Fw), and one reverse EGFR-scFv-Rv primer (Table S1). Human IgG-Fc-C223P sequences were added at the end of anti-EGFR-scFv sequences by the fusion PCR using EGFR and Fc primers (Table S1). The resulting DNA fragment (leader sequence-anti-EGFR scFv-Fc) was subcloned into pCGfd by using the Gibson assembly method, which generated pCGfd-aEGFR-scFv-Fc.

The one vector CRISPR/cas9 system based on the pCGfd vector was constructed for efficient gene editing. The U6 promoter gRNA scaffold from pX330S-2 (58778; Addgene, Watertown, MA, USA) and the 1BP-NLS-Cas9-1BP-NLS-2AGFP gene from pCAG-1BP-NLS-Cas9-1BP-NLS-2AGFP (87109; Addgene) was amplified using U6-gR<sub>Sca</sub> and NLS-GFP primers (Table S1). The resulting DNA fragments were subcloned into pCGfd vector, which generated pCGfd-gR-Cas9-2A-GFP. gRNA targeting EGFR gene was designed by using CCTop (<https://crispr.cos.uni-heidelberg.de/>) and subcloned into the pCGfd-gR-Cas9-2A-GFP, which produced pCGfd-gR-EGFR-Cas9-2A-GFP.

### **Detection of EGFR using flow cytometry and immunoblotting**

Cells were harvested and fixed with 2% paraformaldehyde (Bio-solution, Ansan, Korea) for 10 min. After fixing, the cells were permeabilized with permeabilization buffer (eBioscience, San Diego, CA, USA). The permeabilized cells were incubated with normal rabbit IgG (NI01; Sigma-Aldrich) or anti-EGFR antibody (Merck-Millipore) for 30 min at 4 °C. After incubation, the cells were incubated with Alexa Fluor 647-tagged anti-rabbit IgG secondary antibody (Thermo Fisher Scientific) for 30 min at 4 °C, and then analyzed by flow cytometry (FACS verse).

To detect the EGFR expressions in the wild-type and EGFR-knockout (EGFR<sup>KO</sup>) A431 cells, the harvested cells were lysed with sample buffer and boiled for 10 min. The samples were then separated by SDS-PAGE using an 8% gel, and then transferred to a polyvinylidene fluoride (PVDF) membrane. The membrane was blocked by incubating with 5% skim milk for 1 h, followed by incubation with anti-EGFR (Merck-Millipore) and  $\beta$ -actin (Sigma Aldrich) antibodies for overnight at 4 °C. After incubation, the membrane was washed three times with TBST. The membrane was then incubated with HRP-conjugated anti-rabbit (Enzo Life Science, Farmingdale, NY, USA) or mouse IgG (Thermo Fisher Scientific) secondary antibodies for 1 h. The target protein bands were visualized using a chemiluminescence ECL solution.

**Table S1. Primer sequences**

| <b>Primer name</b> | <b>Primer sequences</b>                                   | <b>Product</b>           |
|--------------------|-----------------------------------------------------------|--------------------------|
| GFP-Fw             | 5'-CATGCCATGGTGTGAGCAAGGGCGAGG-3'                         | GFP                      |
| GFP-Rv             | 5'-CTAGCTAGC TTAGCTTGTACAGCTCGTCCATG-3'                   | GFP                      |
| dMAR-1-Fw          | 5'-CCTCTACAAATGTGGTATGGTAAAATCAGCAGTTCAACCTG-3'           | pCGfd-GFP                |
| dMAR-1-Rv          | 5'-ATTGACTCCTGCAGGAATTCTAATTTTAATTAACAGGTAGTTG-3'         | pCGfd-GFP                |
| dMAR-2-Fw          | 5'-GAATTCCTGCAGGAGTCAAT-3'                                | pCGfd-GFP                |
| dMAR-2-Rv          | 5'-CCATACCACATTTGTAGAGG-3'                                | pCGfd-GFP                |
| EGFR-1st-Fw        | 5'-TCTGGGTGTCAGGCACCTGTGGAGACATCTTGCTGACTCAGTCTCC-3'      | Anti-EGFR-scFv           |
| SP-2nd-Fw          | 5'-GGCCCAAGTGCTGATGCTGTTGCTGCTCTGGGTGTCAGGCACCTGT-3'      | Anti-EGFR-scFv           |
| SP-3rd-Fw          | 5'-GGTGTACAGTAGCTTCCACCATGGACTCCCAGGCCCAAGTGCTGATGCTGT-3' | Anti-EGFR-scFv           |
| EGFR-scFv-Rv       | 5'- TCTGGAGATTTGGGCTCAACTGCAGAGACAGTGACCAGAG-3'           | Anti-EGFR-scFv           |
| Fc-Fw              | 5'-GTTGAGCCCAAATCTCCAGAC-3'                               | Anti-EGFR-scFv-Fc        |
| Fc-Rv              | 5'- CTTATCATGTCTGGCCAGCTAGCTCATTTACCCGGAGACAG-3'          | Anti-EGFR-scFv-Fc        |
| U6-gRSca-Fw        | 5'-CGTTAATTAAGGCATGTGAGGGCCTATTTC-3'                      | U6 promoter gRNA         |
| U6-gRSca-Rv        | 5'-CGGAATTC TAGAGCCATTTGTCTGCAG-3'                        | U6 promoter gRNA         |
| NLS-GFP-Fw         | 5'-GGTGTACAGTAGCTTCCACCATGAAGCGGACTGCTGATGG-3'            | 1BPNLS-Cas9-1BPNLS-2AGFP |
| NLS-GFP-Rv         | 5'-CTTATCATGTCTGGCCAGCTAGCTCACTTGTACAGCTCGTCCATGC-3'      | 1BPNLS-Cas9-1BPNLS-2AGFP |
| gRHEGFR-Fw         | 5'-CACCGGAAAACCTGCAGATCATCAG                              | guide RNA EGFR           |
| gRHEGFR-Rv         | 5'-AAACCTGATGATCTGCAGGTTTTCC-3'                           | guide RNA EGFR           |

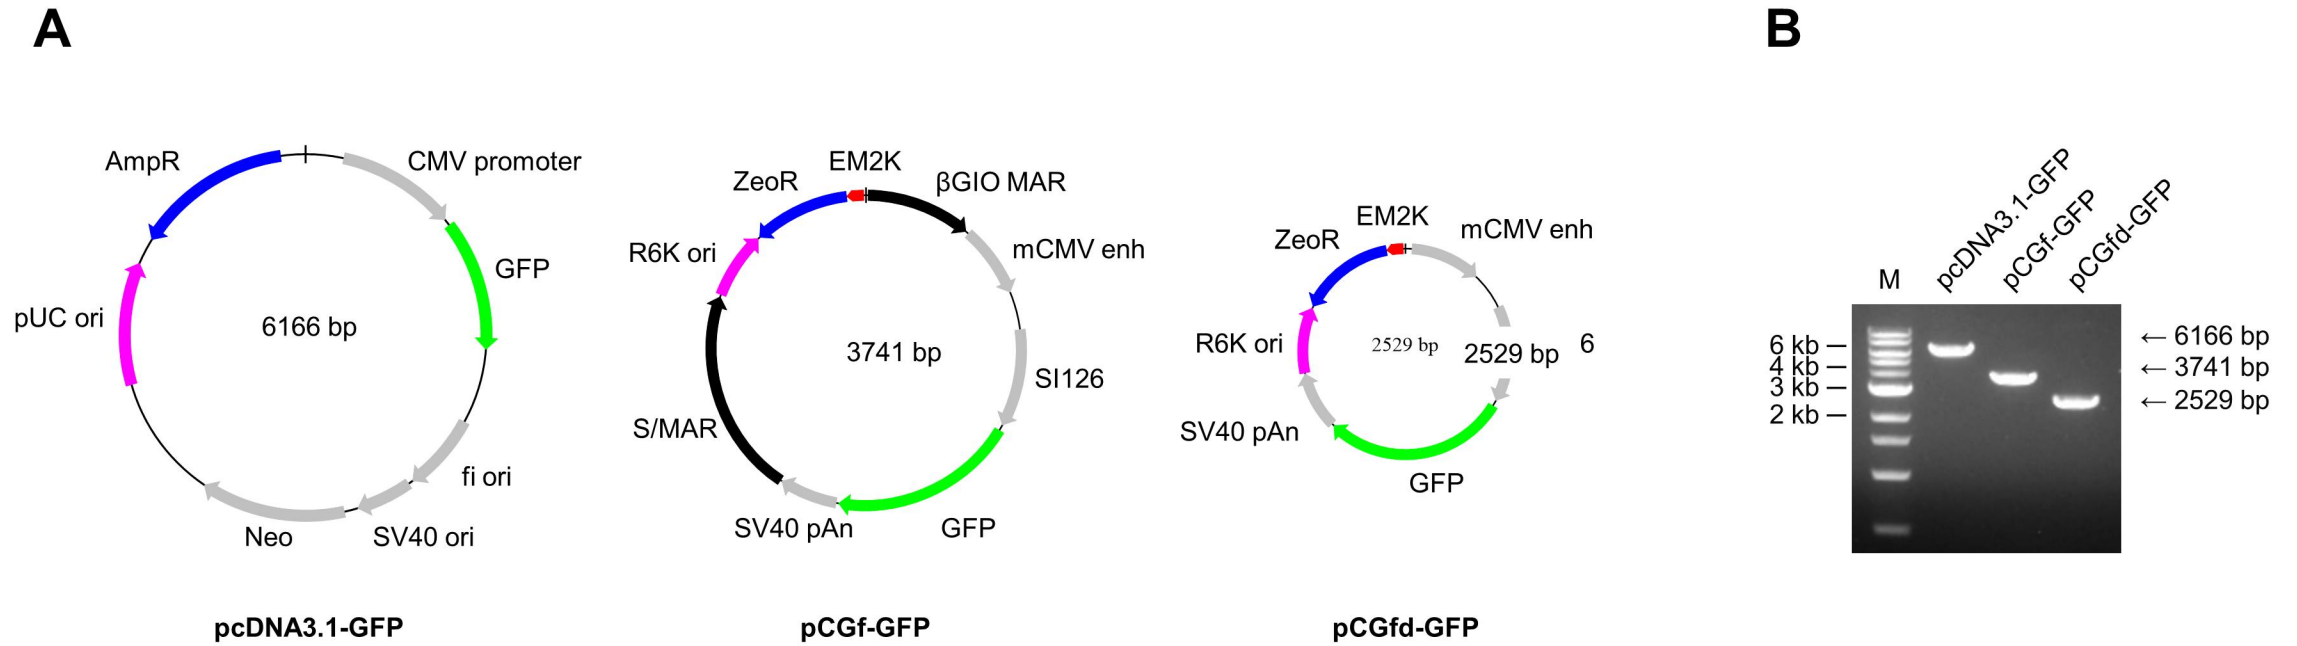

**Fig. S1.** Establishment of pcDNA3.1-GFP, pCGf-GFP, and pCGfd-GFP vectors. (A) Plasmid maps for pcDNA3.1-GFP, pCGf-GFP, and pCGfd-GFP. (B) Plasmids were incubated with the restriction enzyme, NheI, and then separated in 1% agarose gel. M: DNA size marker

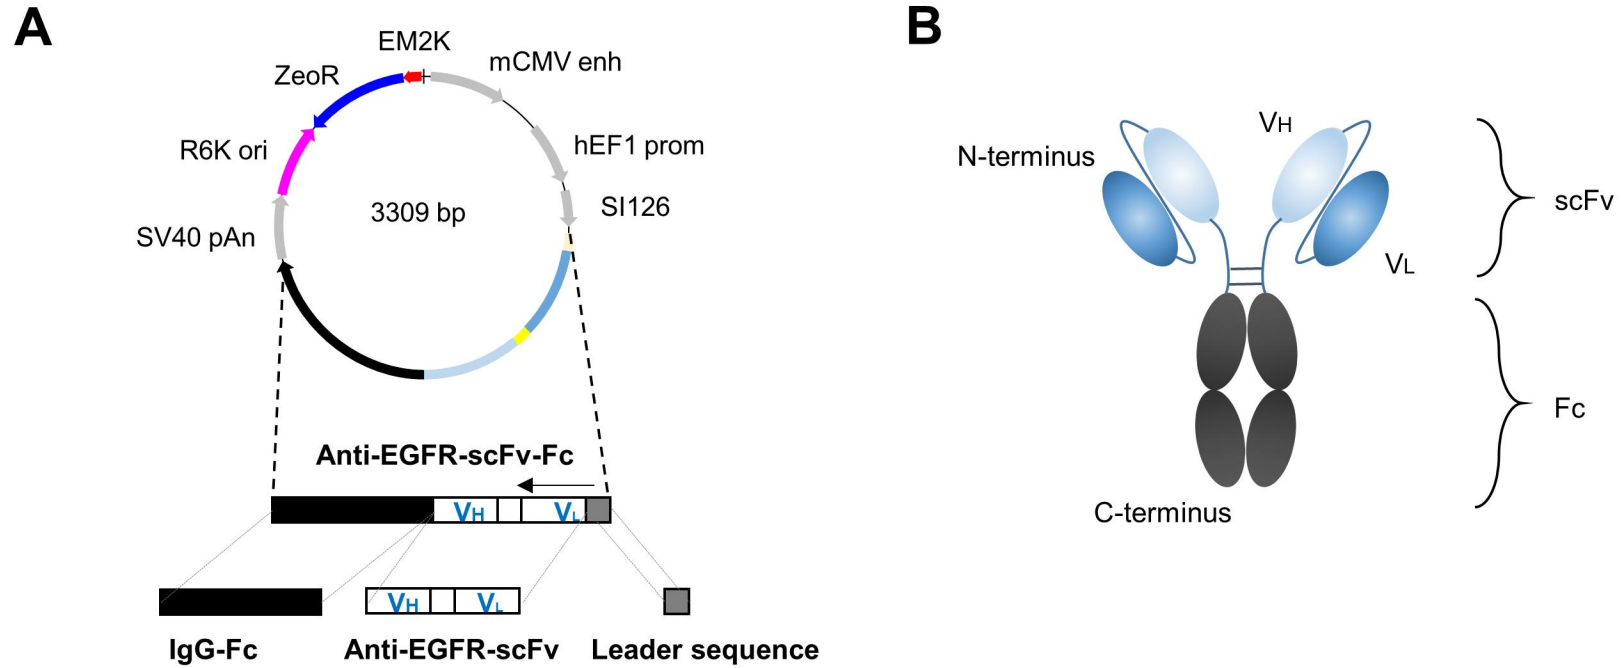

**Fig. S2.** The vector for secretory expression of anti-EGFR scFv-Fc. (A) Plasmid map of pCGfd-aEGFR-scFv-Fc. The sequences coding the leader sequence, anti-EGFR-scFv, and IgG-Fc are represented. (B) Domain structure of anti-EGFR scFv-Fc antibody.

**A**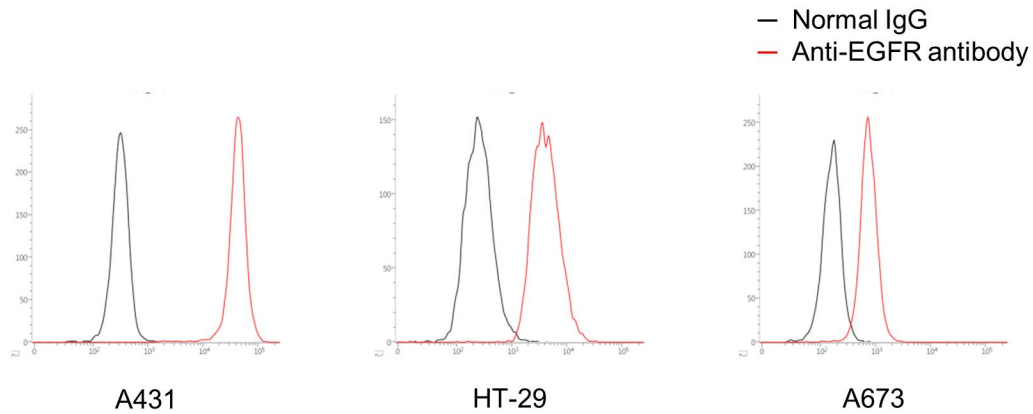**B**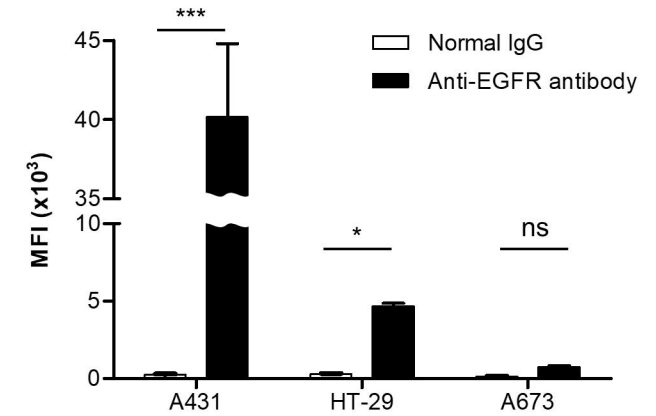

**Fig. S3.** The EGFR expression levels of A431, HT-29, and A673 cells. (A) Representative histograms of EGFR expressions. The EGFR expressions of A431, HT-29, and A673 cells were analyzed by the flow cytometry using an anti-EGFR antibody. (B) Mean fluorescence intensities (MFIs) of EGFR expressions were compared. Data are the means  $\pm$  standard deviation,  $n = 3$ . Statistical significance was determined by Two-way ANOVA, ns = non-significance,  $*p < 0.05$ , and  $***p < 0.001$ .

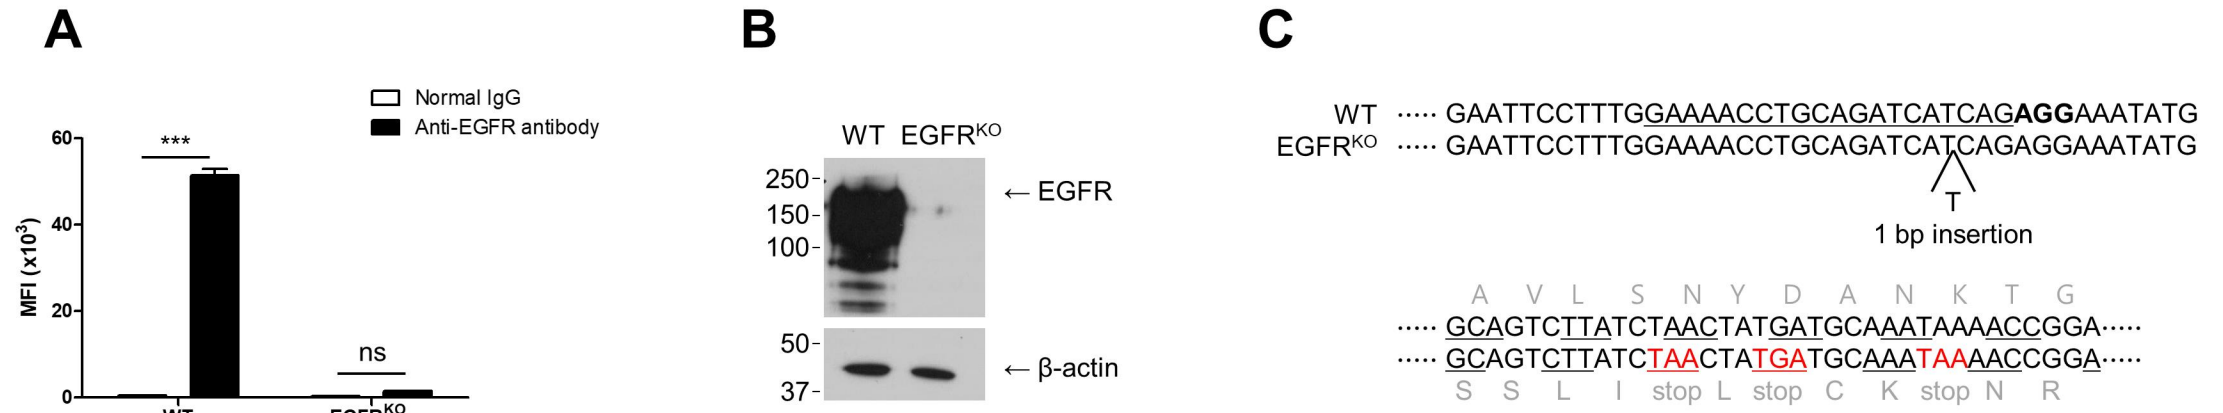

**Fig. S4.** Establishment of EGFR<sup>KO</sup> A431 cells. The EGFR<sup>KO</sup> A431 cells were generated using CRISPR/Cas9. The EGFR expression levels of wild-type (WT) and EGFR<sup>KO</sup> cells were analyzed by flow cytometry (A) and immunoblotting (B) using an anti-EGFR antibody. Data are presented as the mean  $\pm$  standard deviation,  $n = 3$ . Statistical significance was determined by two-way ANOVA, ns = non-significance, and \*\*\* $p < 0.001$ . (C) The alignment of the EGFR sequences between the wild type and EGFR<sup>KO</sup> clone. Red letters indicate the stop codons induced by one bp insertion in the EGFR<sup>KO</sup> clone.
